# Supplementary material for: Hydrophobic radicals embedded in neutral surfactants for dynamic nuclear polarization of aqueous environments at 9.4 Tesla
Source: Royal Society of Chemistry journal article supplement (doi:10.1039/c4cc02152e), 2014-01-01
Supplement: c4cc02152e1.pdf [file c4cc02152e1.pdf]

SUPPLEMENTARY INFORMATION

**Hydrophobic Radicals Embedded in Neutral Surfactants for  
Dynamic Nuclear Polarization of Aqueous Environments at  
9.4 Tesla.**

Moreno Lelli,<sup>a</sup> Aaron J. Rossini,<sup>a</sup> Gilles Casano,<sup>b</sup> Olivier Ouari,<sup>b</sup> Paul Tordo,<sup>b</sup> Anne Lesage,<sup>a</sup> and Lyndon Emsley<sup>a</sup>

<sup>a</sup> Centre de RMN à Très Hauts Champs, Institut de Sciences Analytiques (CNRS/ENS Lyon/UCB Lyon 1), Université de Lyon, 69100 Villeurbanne, France.

<sup>b</sup> Aix-Marseille Université, CNRS, ICR UMR 7273, 13397 Marseille, France.

\*To whom correspondence should be addressed. E-mail: [Lyndon.Emsley@ens-lyon.fr](mailto:Lyndon.Emsley@ens-lyon.fr)

**This PDF file includes:**

Materials and Methods

Scheme S1

Table S1

References

## SUPPLEMENTARY INFORMATION

**Materials and Methods.**

**General Information.** The surfactants Tween-80®, Brij® C10 (Brij-56), IGEPAL® CO-630, and sodium dodecyl sulphate (SDS) were purchased from Sigma-Aldrich. L-Alanine was purchased from ACROS Organics,  $\alpha$ -D-Glucose was purchased from Sigma-Aldrich, Uniformly  $^{13}\text{C}$ -labelled L-proline was purchased from Cambridge Isotope Laboratories. The radical BDPA was purchased from Sigma-Aldrich, while bTbK,<sup>1</sup> bCTbK,<sup>2</sup> and TEKPol<sup>3</sup> were prepared following the synthesis already reported in the literature.

**DNP-NMR Methods.** All DNP-enhanced NMR experiments were performed using a solid-state 400 MHz DNP-NMR spectrometer designed by Bruker-Biospin<sup>4</sup>. This system consists of a wide-bore 9.4 T magnet ( $\omega_{\text{H}}/(2\pi) = 400.3$  MHz,  $\omega_{\text{C}}/(2\pi) = 100.7$  MHz) with a Bruker Avance III spectrometer console, and is equipped with a double/triple resonance 3.2 mm low-temperature CP-MAS probe. DNP is achieved by irradiating the sample with high-power microwaves at a frequency of 263 GHz that are generated by a gyrotron and are delivered to the sample by a corrugated wave-guide ( $\sim 5$  W of power reaching the sample). The gyrotron operates continuously during the DNP-enhanced experiments (stability of better than  $\pm 1\%$ ). Sapphire rotors (with  $\text{ZrO}_2$  caps) were used for optimal microwave penetration. Spinning frequencies were regulated to  $8.0 \text{ kHz} \pm 2 \text{ Hz}$ . The sample temperatures were  $\approx 105 \text{ K}$ . The chemical shifts are referenced to TMS at 0 ppm.  $^1\text{H}$  1D direct excitation experiments were acquired with a rotor synchronized spin echo in order to suppress the background signals. The pulse sequence was:  $\pi/2 - \tau - \pi - \tau - \text{acquisition}$ ,  $\pi/2$  and  $\pi$  hard pulses were calibrated at  $2.5 \mu\text{s}$  and  $5.0 \mu\text{s}$  ( $100 \text{ kHz}$ ), respectively. The  $\tau$  echo-delays were set to 1 rotor period. Experiments were acquired over a spectral window of  $200 \text{ kHz}$ , with an acquisition time of  $5.12 \text{ ms}$ , and a recycle delay of  $3.0 \text{ s}$ . Standard cross-polarization (CP) was used for the acquisition of 1D  $^{13}\text{C}$  spectra, the recycle delay between scans was  $2.0 \text{ s}$  in all experiments. The  $^1\text{H}$   $\pi/2$  pulse length was  $2.5 \mu\text{s}$ .

## SUPPLEMENTARY INFORMATION

( $\nu_1 = 100$  kHz). A linear amplitude ramp (from 100% to 50% of the nominal RF field strength) was used for the  $^1\text{H}$  channel, with a 2.0 ms contact time ( $\tau_{\text{CP}}$ ), and a nominal RF-field amplitude ( $\nu_1$ ) of 88.4 kHz for  $^1\text{H}$  and 58.1 kHz for  $^{13}\text{C}$ . SPINAL-64<sup>5</sup> proton decoupling was applied during the acquisition of the  $^{13}\text{C}$  signal with  $\nu_1 = 100$  kHz. The 1D fid  $^{13}\text{C}$  acquisition time was 25.3 ms for 1024 complex points. 1D spectra were processed using exponential window functions with a linebroadening of 200 Hz for  $^{13}\text{C}$  and 400 Hz for  $^1\text{H}$  spectra.

**Solution-NMR Methods.** Liquid state NMR spectra were acquired on a 600 MHz Bruker instrument (14.1 T) equipped with a  $^1\text{H}/^{13}\text{C}/^{15}\text{N}$  cryoprobe and an Avance III Bruker console. The samples were prepared in aqueous environment using  $\text{H}_2\text{O}/\text{D}_2\text{O}$  90/10 as solvent. The temperature was stabilized to 298 K.

The  $^1\text{H}$  1D spectra were acquired with an excitation sculpting water suppression sequence,<sup>6</sup> with selective  $\pi$  pulses on water of 2000  $\mu\text{s}$ , non-selective  $\pi$  pulses of 20.4  $\mu\text{s}$  and a short  $\pi/2$  excitation pulse of 1.0  $\mu\text{s}$ . Each spectrum was recorded accumulating 128 scans with 852 ms of acquisition time and 1.15 s of recycle delay. The spectra were processed with an exponential windows function of 0.3 Hz.

The  $^{13}\text{C}$  1D spectra were acquired with a direct excitation double-echo experiment to suppress the probe background and to remove the baseline distortion. The sequence was  $\pi/2 - \tau - \pi - 2\tau - \pi - \tau - \text{acquisition}$ : the  $\pi/2$  and  $\pi$  hard pulses were calibrated at 12.0  $\mu\text{s}$  and 24.0  $\mu\text{s}$ , respectively; the  $\tau$  echo-delays were optimized to 50  $\mu\text{s}$  each. Waltz-16  $^1\text{H}$ -decoupling at 3.12 kHz was applied during acquisition and a weaker  $^1\text{H}$ -decoupling at  $\sim 2$  kHz was kept during the recycle delay. Each experiment was acquired accumulating 128 scans with 865 ms of acquisition (64 k real points) and 2.0 s of recycle delay. The spectra were processed with an exponential windows function of 0.3 Hz.

## SUPPLEMENTARY INFORMATION

**Sample Preparation.**

*bTbK dissolved in sodium dodecyl sulphate aqueous solutions.* A solution of 100 mM sodium dodecyl sulphate (SDS) and 50 mM  $\alpha$ -D-Glucose solution was prepared in H<sub>2</sub>O/D<sub>2</sub>O 90/10. The dissolution of bTbK was performed by directly stirring a weighted amount of bTbK powder with the previously prepared 100 mM SDS solution until complete dissolution.

*bTbK dissolved in glycerol/water/SDS solution.* A solution of 400 mM sodium dodecyl sulphate (SDS) and 50 mM L-alanine was prepared by dissolving the weighted powder in a *d*<sub>8</sub>-Glycerol:D<sub>2</sub>O:H<sub>2</sub>O 60:30:10 mixture. bTbK was then dissolved by directly stirring the radical powder in the above prepared glycerol/water/SDS solution by gently heating the mixture at 40-50 °C.

*Radicals dissolved in glycerol/water/surfactant solution.* The used radical (bTbK, bCTbK, TEKPol, or BDPA) was first dissolved in the pure surfactant (Tween-80®, Brij® 56, IGEPAL® CO-630) by stirring the radical powder in the melted amphiphile gently heated at around 40-50 °C. Radical solution with a concentration of ~50 mM can thus be obtained in such a way. Then this solution was diluted up to the desired radical concentration by addition of the *d*<sub>8</sub>-Glycerol:D<sub>2</sub>O:H<sub>2</sub>O 60:30:10 mixture. Uniformly <sup>13</sup>C-labelled L-proline was added to the solution in order to have a final concentration of 12 mM in proline to monitor the <sup>13</sup>C enhancement in CP experiments. For the case of Tween-80 and a radical concentration of 12 mM, a final surfactant concentration of ~190 mM was used.

## SUPPLEMENTARY INFORMATION

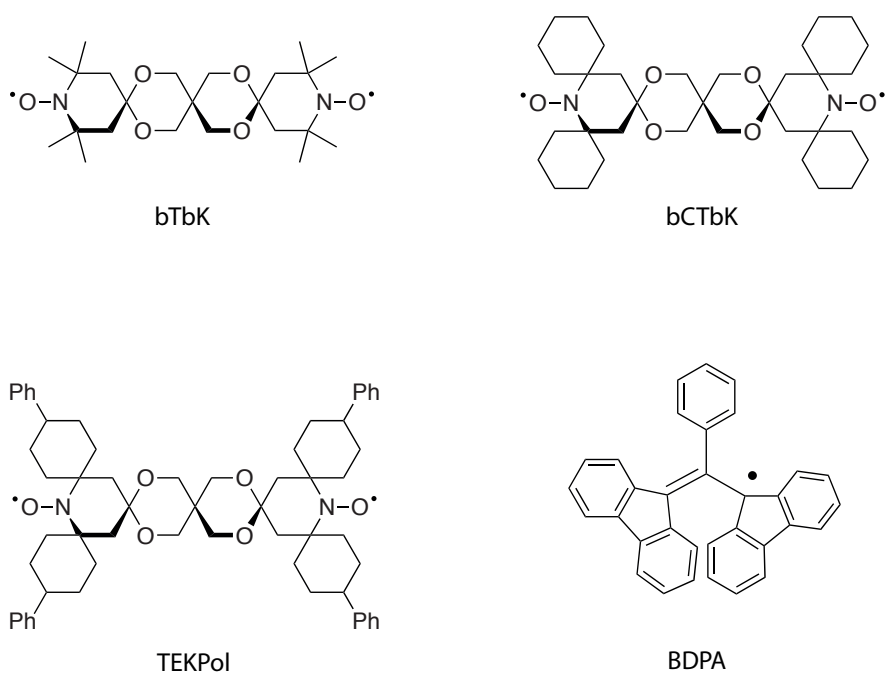

**Scheme S1.** Molecular structures of the radicals.

## SUPPLEMENTARY INFORMATION

**Table S1.** DNP Enhancements observed for several water-insoluble radicals solubilized in different surfactant solutions. The  $^1\text{H}$  ( $\epsilon_{\text{H}}$ ) and the  $^{13}\text{C}$  ( $\epsilon_{\text{C,CP}}$ ) enhancements are measured comparing experiment with and without microwave irradiation in direct excitation and  $^1\text{H}$ - $^{13}\text{C}$  CP experiments, respectively (the conditions are reported in the Materials and Methods section).

| Radical | Amphiphile    | Conc. (mM) | $\epsilon_{\text{H}}$ | $\epsilon_{\text{C,CP}}$ |
|---------|---------------|------------|-----------------------|--------------------------|
| bTbK    | SDS           | 10         | 17                    | 17                       |
| bTbK    | Tween-80      | 12         | 42                    | 44                       |
| bCTbK   | Tween-80      | 12         | 22                    | 24                       |
| BDPA    | Tween-80      | 14         | 4.8                   | -                        |
| TEKPol  | Tween-80      | 7.5        | 58                    | 59                       |
| TEKPol  | Brij-56       | 10         | 8.9                   | 10                       |
| TEKPol  | IGEPAL CO-630 | 10         | 15                    | 16                       |

## SUPPLEMENTARY INFORMATION

## References

1. Y. Matsuki, T. Maly, O. Ouari, H. Karoui, F. Le Moigne, E. Rizzato, S. Lyubenova, J. Herzfeld, T. Prisner, P. Tordo, and R. G. Griffin, *Angew. Chem. Int. Ed.*, 2009, **48**, 4996–5000.
2. A. Zagdoun, G. Casano, O. Ouari, G. Lapadula, A. J. Rossini, M. Lelli, M. Baffert, D. Gajan, L. Veyre, W. E. Maas, M. Rosay, R. T. Weber, C. Thieuleux, C. Copéret, A. Lesage, P. Tordo, and L. Emsley, *J. Am. Chem. Soc.*, 2012, **134**, 2284–2291.
3. A. Zagdoun, G. Casano, O. Ouari, M. Schwarzwälder, A. J. Rossini, F. Aussenac, M. Yulikov, G. Jeschke, C. Copéret, A. Lesage, P. Tordo, and L. Emsley, *J. Am. Chem. Soc.*, 2013, **135**, 12790–12797.
4. M. Rosay, L. Tometich, S. Pawsey, R. Bader, R. Schauwecker, M. Blank, P. M. Borchard, S. R. Cauffman, K. L. Felch, R. T. Weber, R. J. Temkin, R. G. Griffin, and W. E. Maas, *Phys. Chem. Chem. Phys.*, 2010, **12**, 5850–5860.
5. B. M. Fung, A. K. Khitrin, and K. Ermolaev, *J. Magn. Reson.*, 2000, **142**, 97–101.
6. T. L. Hwang and A. J. Shaka, *J. Magn. Reson., A*, 1995, **112**, 275–279.
